# Supplementary material for: Coke relocation and Mo immobilization in donut-shaped Mo/HZSM-5 catalysts for methane dehydroaromatization
Source: Royal Society of Chemistry journal article supplement (doi:10.1039/d3ta05418g), 2023-01-01
Supplement: d3ta05418g1.pdf [file d3ta05418g1.pdf]

## Coke Relocation and Mo Immobilization in Donut-Shaped Mo/HZSM-5 Catalysts for Methane Dehydroaromatization

Ming Cheng<sup>a,†</sup>, Hugo Cruchade<sup>b,†</sup>, Ludovic Pinard<sup>b</sup>, Eddy Dib<sup>b</sup>, Honghai Liu<sup>c</sup>, Jiujiang Wang<sup>c</sup>, Xinmei Liu<sup>a</sup>, Zi-Feng Yan<sup>a</sup>, Zhengxing Qin<sup>a\*</sup>, Svetlana Mintova<sup>b\*</sup>

<sup>a</sup>State Key Laboratory of Heavy Oil Processing, College of Chemical Engineering, China University of Petroleum (East China), No. 66, West Changjiang Road, Huangdao District, Qingdao, China, 266580.

<sup>b</sup>Laboratoire Catalyse et Spectrochimie, Normandie Univ, ENSICAEN, UNICAEN, CNRS, 6 Bd Marchal Juin, Caen, France, 14000.

<sup>c</sup>Petrochemical Research Institute, PetroChina Company Limited, Beijing 100195, P. R. China

<sup>†</sup>Equally contributed

\*Corresponding authors: zhengxing.qin@upc.edu.cn; svetlana.mintova@ensicaen.fr

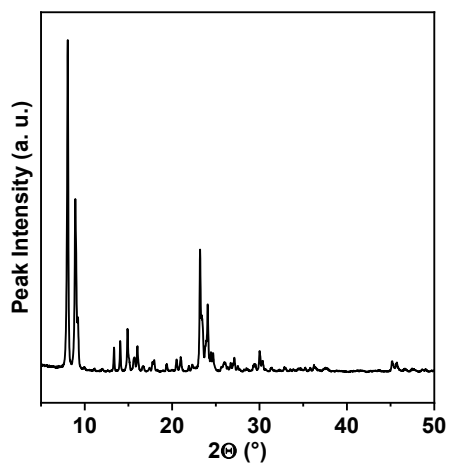

Figure SI.1. XRD patterns of Silicalite-1 seeds.

---

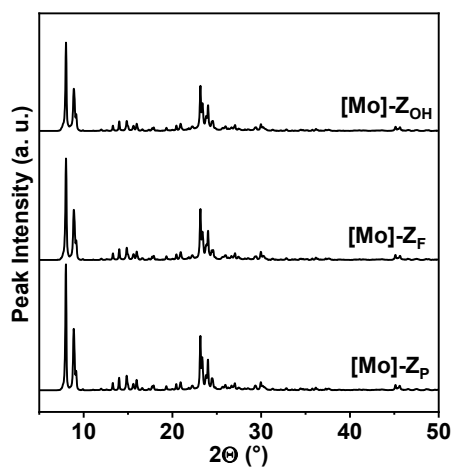

Figure SI.2. XRD patterns of [Mo]-Z<sub>p</sub>, [Mo]-Z<sub>f</sub>, [Mo]-Z<sub>oh</sub> zeolite catalysts.

---

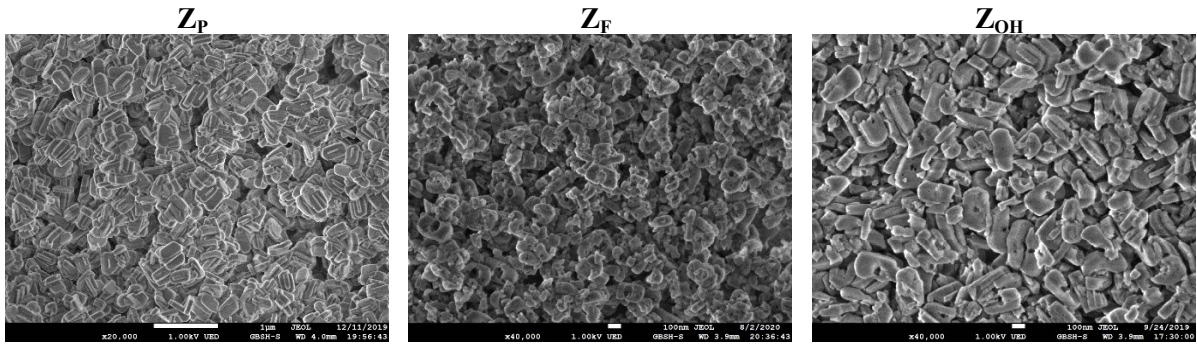

Figure SI.3. SEM images of  $Z_p$ ,  $Z_F$ , and  $Z_{OH}$  zeolite catalysts.

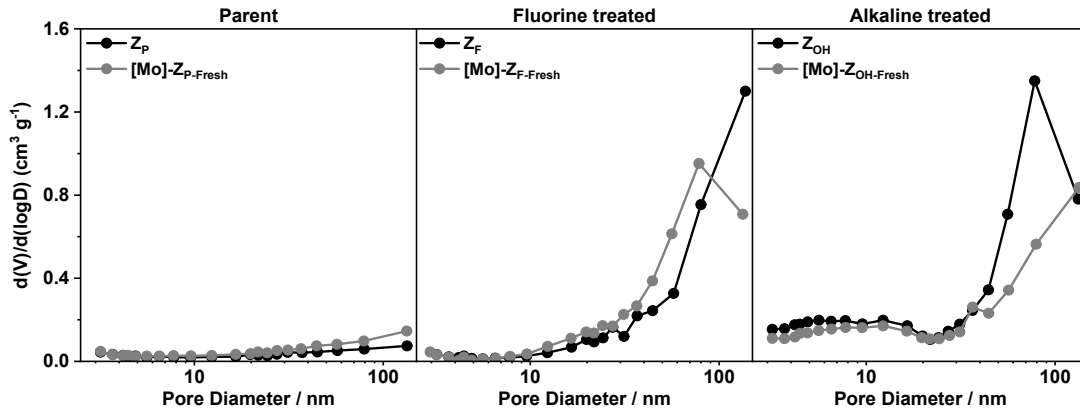

Figure SI.4. BJH pore size distribution of [Mo]-ZP, [Mo]-ZF, [Mo]-ZOH zeolite catalysts (adsorption branches).

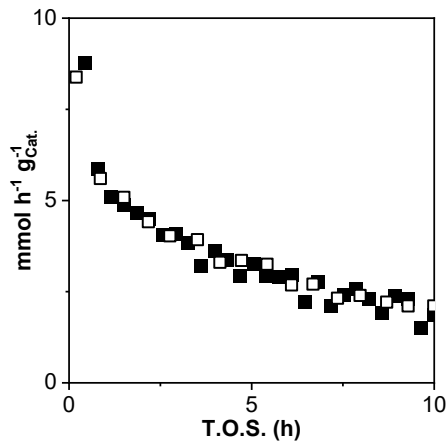

Figure SI.5. Methane conversion as a function of time on stream on [Mo]-Z<sub>p</sub> (■) compared to a 3wt.%Mo/ZSM-5 (Si/Al = 40) catalyst reported in the literature<sup>1</sup>.

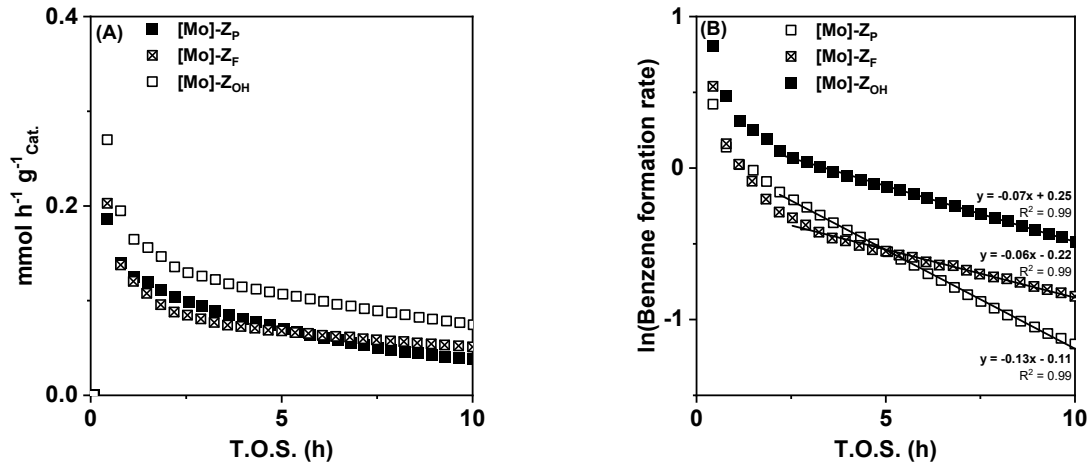

Figure SI.6. (A) Benzene formation rate and (B) logarithm of benzene formation rate as a function of time on stream on [Mo]-Z<sub>p</sub>, [Mo]-Z<sub>f</sub> and [Mo]-Z<sub>oh</sub> catalysts.

## Determination of cokes distribution

### [Mo]-Z<sub>p-Spent</sub>, assumption: coke only in the micropores

Total coke content: 9.3 wt.%

Loss of microporous volume ( $V_{[\text{Mo}]-\text{Z}_p-\text{Spent}}^{\text{Micro, loss}}$ ):  $0.07 \text{ cm}^3 \text{ g}^{-1}$

The coke molecules are mainly pyrene ( $\rho_{\text{Pyrene}} = 1.27 \text{ g cm}^{-3}$ ) and benzopyrene ( $\rho_{\text{Benzopyrene}} = 1.24 \text{ g cm}^{-3}$ ).

The volume occupied by pyrene molecules ( $V_{\text{Pyrene}}$ ) can be estimated as follow based on 1 g of catalyst:

$$V_{\text{Pyrene}} = \rho_{\text{Pyrene}} \times V_{[\text{Mo}]-\text{Z}_p-\text{Spent}}^{\text{Micro, loss}} = 1.27 \times 0.07 = 0.089 \text{ g}$$

For 1 g of catalyst, the coke content measured by TGA (0.093 g) is close to the volume occupied by pyrene molecules (0.089 g).

### [Mo]-Z<sub>f-Spent</sub>, assumption: coke in the micropores and macropores

Total coke content ( $\text{Coke}_{[\text{Mo}]-\text{Z}_f-\text{Spent}}^{\text{Total}}$ ): 7.7 wt.%

Loss of microporous volume ( $V_{[\text{Mo}]-\text{Z}_f-\text{Spent}}^{\text{Micro, loss}}$ ):  $0.03 \text{ cm}^3 \text{ g}^{-1}$

Based on the linear relationship between coke content and loss of microporous volume<sup>3</sup>, the amount in the micropores ( $\text{Coke}_{[\text{Mo}]-\text{Z}_f-\text{Spent}}^{\text{Micro}}$ ) can be estimated as follow:

$$\text{Coke}_{[\text{Mo}]-\text{Z}_f-\text{Spent}}^{\text{Micro}} = \frac{V_{[\text{Mo}]-\text{Z}_f-\text{Spent}}^{\text{Micro, loss}}}{V_{[\text{Mo}]-\text{Z}_p-\text{Spent}}^{\text{Micro, loss}}} \times \text{Coke}_{[\text{Mo}]-\text{Z}_p-\text{Spent}}^{\text{Micro}}$$

For 1 g of catalyst, the  $Coke_{[Mo]-Z_F-Spent}^{Micro}$  is:

$$Coke_{[Mo]-Z_F-Spent}^{Micro} = \frac{0.03}{0.07} \times 0.093 = 0.04 \text{ g}$$

From coke balance, the amount of coke located in the macropores ( $Coke_{[Mo]-Z_F-Spent}^{Macro}$ ) is assessed to be 0.037 g for 1 g of catalyst, according to the following equation:

$$Coke_{[Mo]-Z_F-Spent}^{Macro} = Coke_{[Mo]-Z_F-Spent}^{Total} - Coke_{[Mo]-Z_F-Spent}^{Micro} = 0.077 - 0.04 = 0.037 \text{ g}$$

**[Mo]-Z<sub>OH-Spent</sub>, assumption: coke in the micropores, mesopores and macropores**

Total coke content ( $Coke_{[Mo]-Z_{OH-Spent}}^{Total}$ ): 10.8 wt.%

Loss of microporous volume ( $V_{[Mo]-Z_{OH-Spent}}^{Micro, loss}$ ): 0.03 cm<sup>3</sup> g<sup>-1</sup>

The loss of microporous volume is similar to the [Mo]-Z<sub>F-Spent</sub> catalyst, thus the  $Coke_{[Mo]-Z_{OH-Spent}}^{Micro}$  can be estimated to be 0.04 g for 1 g of catalyst.

By assuming a similar deposit in the macropores, as for the [Mo]-Z<sub>F-Spent</sub> catalyst, the  $Coke_{[Mo]-Z_{OH-Spent}}^{Macro}$  can be estimated to be 0.037 g for 1 g of catalyst. From coke balance, the coke located in the additional mesoporosity ( $Coke_{[Mo]-Z_{OH-Spent}}^{Meso}$ ) is assessed to be 0.031 g for 1 g of catalyst:

$$\begin{aligned} Coke_{[Mo]-Z_{OH-Spent}}^{Meso} &= Coke_{[Mo]-Z_{OH-Spent}}^{Total} - Coke_{[Mo]-Z_{OH-Spent}}^{Micro} - Coke_{[Mo]-Z_{OH-Spent}}^{Macro} \\ &= 0.108 - 0.04 - 0.037 \\ &= 0.031 \text{ g} \end{aligned}$$

## References

- 1 M. Rahman, A. Infantes-Molina, A. S. Hoffman, S. R. Bare, K. L. Emerson and S. J. Khatib, *Fuel*, 2020, **278**, 118290.
  - 2 A. Beuque, H. Hao, E. Berrier, N. Batalha, A. Sachse, J.-F. Paul and L. Pinard, *Appl. Catal. B: Environ.*, 2022, **309**, 121274.
  - 3 N. Kosinov, E. A. Uslamin, F. J. A. G. Coumans, A. S. G. Wijkema, R. Y. Rohling and E. J. M. Hensen, *ACS Catal.*, 2018, **8**, 8459–8467.
-
